# Supplementary material for: β-blockers after acute myocardial infarction in patients with chronic obstructive pulmonary disease: A nationwide population-based observational study
Source: PubMed Central journal article supplement (PMC6400336; doi:10.1371/journal.pone.0213187), 2019-03-05
Supplement: pone.0213187.s002.pdf [file pone.0213187.s002.pdf]

### 1 Year Mortality

Severe COPD or respiratory failure

Yes  
No

Congestive heart failure or shock

Yes  
No

### Overall Mortality

Severe COPD or respiratory failure

Yes  
No

Congestive heart failure or shock

Yes  
No

### Major Adverse Cardiac Events in 1 Year

Severe COPD or respiratory failure

Yes  
No

CHF or shock

Yes  
No

### Obstructive Lung Diseases

Severe COPD or respiratory failure

Yes  
No

Congestive heart failure or shock

Yes  
No

### Respiratory Diseases

Severe COPD or respiratory failure

Yes  
No

Congestive heart failure or shock

Yes  
No

RR [95% CI]

0.78 [0.68, 0.89]  
0.82 [0.73, 0.92]

0.81 [0.74, 0.89]  
0.79 [0.63, 0.98]

0.85 [0.79, 0.93]  
0.90 [0.84, 0.95]

0.88 [0.83, 0.93]  
0.91 [0.82, 1.00]

0.92 [0.85, 1.01]  
1.00 [0.95, 1.06]

0.97 [0.92, 1.03]  
1.01 [0.94, 1.10]

0.67 [0.60, 0.75] \*  
0.83 [0.75, 0.92]

0.70 [0.65, 0.77] \*  
0.87 [0.76, 1.01]

0.83 [0.77, 0.90] \*  
0.93 [0.87, 0.99]

0.88 [0.83, 0.93]  
0.92 [0.84, 1.02]

RR [95% CI]

0.95 [0.76, 1.20]  
0.89 [0.70, 1.14]

0.94 [0.78, 1.13]  
0.87 [0.58, 1.30]

0.92 [0.80, 1.05]  
0.90 [0.80, 1.01]

0.91 [0.82, 1.01]  
0.92 [0.78, 1.10]

1.09 [0.94, 1.27]  
1.00 [0.90, 1.11]

1.02 [0.91, 1.13]  
0.99 [0.85, 1.14]

0.57 [0.48, 0.68] \*  
0.83 [0.68, 1.02]

0.66 [0.56, 0.77]  
0.71 [0.55, 0.90]

0.79 [0.69, 0.90] \*  
0.97 [0.84, 1.11]

0.89 [0.79, 1.00]  
0.86 [0.71, 1.03]

Favor  $\beta$ -blockers

Control  $\beta$ -blockers

NDCCB
